# Supplementary material
Source: PubMed Central journal article supplement (PMC3346378)

### Supplemental Figure 1

UPGMA analysis and dendrogram of MLVA-15 profiles for five isolates of *B. abortus* obtained from cattle in Starr County, Texas, in early 2011, and most closely related human clinical isolates in the CDC genotyping database.

MLVA-15

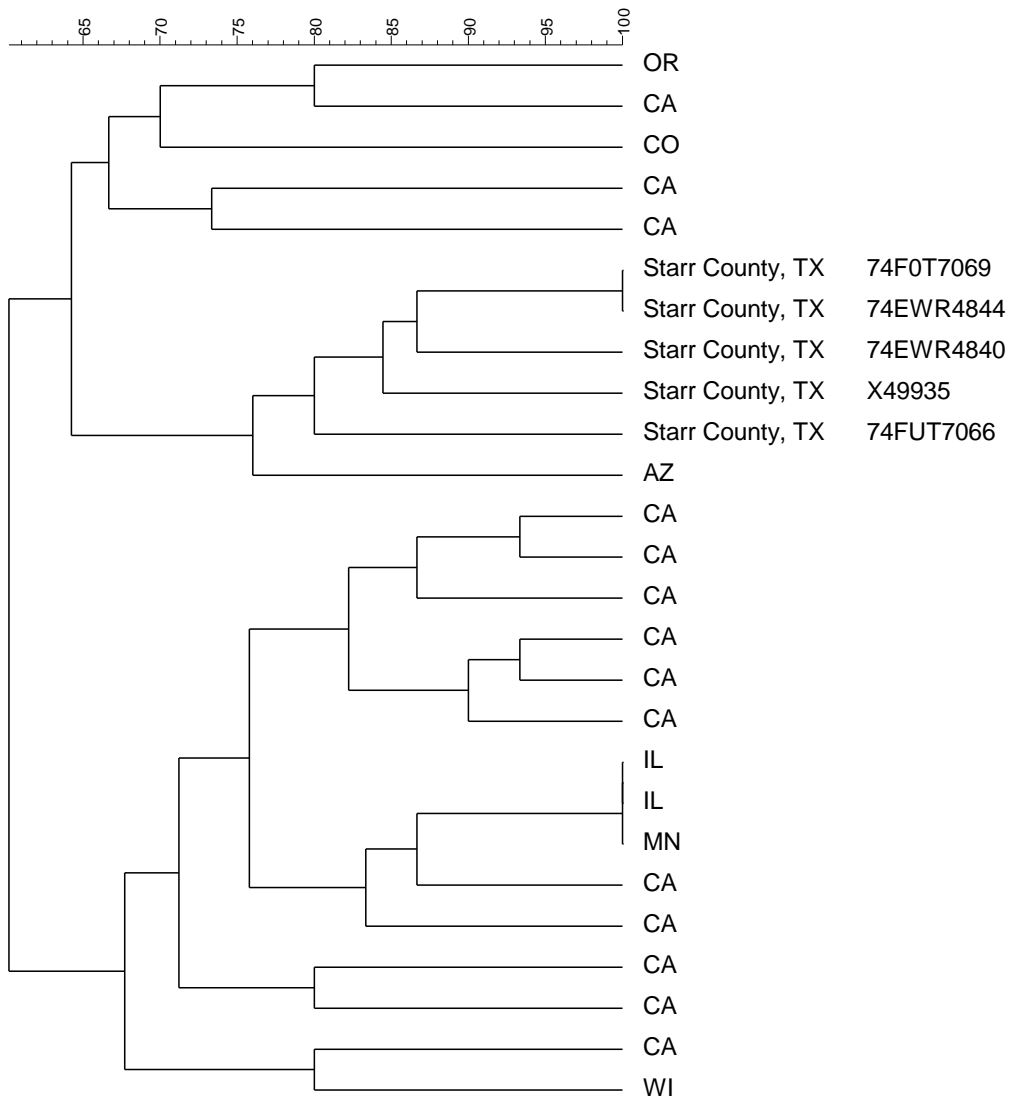

Supplement: supp_78.10.3674_AEM00045-12_FigS1.pdf [file supp_78.10.3674_AEM00045-12_FigS1.pdf]
