# Supplementary material
Source: PubMed Central journal article supplement (PMC3346378)
Supplement: supp_78.10.3674_AEM00045-12_TableS1.pdf [file supp_78.10.3674_AEM00045-12_TableS1.pdf]

**Table S1**

Isolate information and VNTR-10 profiles for 371 *B. abortus* isolates included in the analysis.

| NVSL Accession | NVSL Case # | Animal species | State | Bacterial ID     | Hoof 1 | Hoof 3 | Hoof 4 | Hoof 8 | VNTR 16 | VNTR 17 | VNTR 2 | VNTR 21 | VNTR 5A | VNTR 5B |
|----------------|-------------|----------------|-------|------------------|--------|--------|--------|--------|---------|---------|--------|---------|---------|---------|
| 78-1413        |             |                | FL    | B. abortus bv. 1 | 8      | 3      | 4      | 2      | 3       | 1       | 6      | 2       | 7       | 4       |
| 86-2288        |             | cattle         | ID    | B. abortus bv. 1 | 3      | 3      | 7      | 2      | 3       | 1       | 5      | 2       | 6       | 7       |
| 370006         | 05-0900     | bison          | WY    | B. abortus bv. 1 | 3      | 3      | 8      | 2      | 4       | 1       | 6      | 2       | 5       | 9       |
| 09-032080      | B10-0118    | elk            | MT    | B. abortus bv. 1 | 6      | 3      | 7      | 2      | 4       | 1       | 6      | 2       | 5       | 9       |
| 553663         | 08-0386     | bison          | MT    | B. abortus bv. 1 | 7      | 3      | 6      | 2      | 4       | 1       | 6      | 2       | 5       | 10      |
| 560172         | 08-0860     | bison          | WY    | B. abortus bv. 1 | 9      | 3      | 6      | 2      | 4       | 1       | 6      | 2       | 5       | 10      |
| 561953         | 08-0926     | bison          | MT    | B. abortus bv. 1 | 6      | 3      | 6      | 2      | 4       | 1       | 6      | 2       | 5       | 12      |
| 560167         | 08-0833     | bison          | WY    | B. abortus bv. 1 | 8      | 3      | 11     | 2      | 4       | 1       | 6      | 2       | 5       | 5       |
| 560760         | 08-0871     | bison          | WY    | B. abortus bv. 1 | 13     | 3      | 11     | 2      | 4       | 1       | 6      | 2       | 5       | 5       |
| 563917         | 08-1143     | bison          | WY    | B. abortus bv. 1 | 13     | 3      | 9      | 2      | 4       | 1       | 6      | 2       | 5       | 5       |
| 557006         | 08-0659     | bison          | WY    | B. abortus bv. 1 | 14     | 3      | 13     | 2      | 4       | 1       | 6      | 2       | 5       | 5       |
| 561953         | 08-0934     | bison          | MT    | B. abortus bv. 1 | 11     | 3      | 12     | 2      | 4       | 1       | 6      | 2       | 5       | 7       |
| 561953         | 08-0932     | bison          | MT    | B. abortus bv. 1 | 7      | 3      | 4      | 2      | 4       | 1       | 5      | 2       | 5       | 13      |
| 565748         | 08-1189     | bison          | WY    | B. abortus bv. 1 | 7      | 3      | 5      | 2      | 4       | 1       | 5      | 2       | 5       | 11      |
| 553707         | 08-0404     | bison          | MT    | B. abortus bv. 1 | 7      | 3      | 4      | 2      | 4       | 1       | 6      | 2       | 5       | 11      |
| 553707         | 08-0406     | bison          | MT    | B. abortus bv. 1 | 7      | 3      | 4      | 2      | 4       | 1       | 6      | 2       | 5       | 11      |
| 561953         | 08-0922     | bison          | MT    | B. abortus bv. 1 | 7      | 3      | 4      | 2      | 4       | 1       | 6      | 2       | 5       | 11      |
| 561953         | 08-0925     | bison          | MT    | B. abortus bv. 1 | 7      | 3      | 4      | 2      | 4       | 1       | 6      | 2       | 5       | 11      |
| 561953         | 08-0925     | bison          | MT    | B. abortus bv. 1 | 7      | 3      | 4      | 2      | 4       | 1       | 6      | 2       | 5       | 11      |
| 561953         | 08-0925     | bison          | MT    | B. abortus bv. 1 | 7      | 3      | 4      | 2      | 4       | 1       | 6      | 2       | 5       | 11      |
| 561953         | 08-0931     | bison          | MT    | B. abortus bv. 1 | 7      | 3      | 4      | 2      | 4       | 1       | 6      | 2       | 5       | 11      |
| 561953         | 08-0933     | bison          | WY    | B. abortus bv. 1 | 7      | 3      | 4      | 2      | 4       | 1       | 6      | 2       | 5       | 11      |
| 563110         | 08-1080     | bison          | MT    | B. abortus bv. 1 | 7      | 3      | 4      | 2      | 4       | 1       | 6      | 2       | 5       | 11      |
| 563912         | 08-1120     | bison          | MT    | B. abortus bv. 1 | 7      | 3      | 4      | 2      | 4       | 1       | 6      | 2       | 5       | 11      |
| 567486         | 08-1220     | bison          | WY    | B. abortus bv. 1 | 7      | 3      | 4      | 2      | 4       | 1       | 6      | 2       | 5       | 11      |
| 559510         | 08-0783     | bison          | MT    | B. abortus bv. 1 | 7      | 3      | 4      | 2      | 4       | 1       | 7      | 2       | 5       | 11      |
| 559510         | 08-0795     | bison          | MT    | B. abortus bv. 1 | 7      | 3      | 4      | 2      | 4       | 1       | 5      | 2       | 5       | 11      |
| 562880         | 08-0969     | bison          | WY    | B. abortus bv. 1 | 8      | 3      | 7      | 2      | 4       | 1       | 6      | 2       | 5       | 11      |
| 562880         | 08-0970     | bison          | WY    | B. abortus bv. 1 | 8      | 3      | 7      | 2      | 4       | 1       | 6      | 2       | 5       | 11      |
| 561953         | 08-0922     | bison          | MT    | B. abortus bv. 1 | 8      | 3      | 4      | 2      | 4       | 1       | 6      | 2       | 5       | 11      |
| 563912         | 08-1122     | bison          | MT    | B. abortus bv. 1 | 8      | 3      | 4      | 2      | 4       | 1       | 6      | 2       | 5       | 11      |
| 170815         | 02-0201     | bison          | MT    | B. abortus bv. 1 | 2      | 3      | 7      | 2      | 4       | 1       | 6      | 2       | 5       | 6       |
| 382426         | 05-1143     | bison          | MT    | B. abortus bv. 1 | 2      | 3      | 3      | 2      | 4       | 1       | 6      | 2       | 5       | 11      |
| 563907         | 08-1108     | bison          | WY    | B. abortus bv. 1 | 14     | 3      | 9      | 2      | 4       | 1       | 5      | 2       | 5       | 8       |
| 563912         | 08-1119     | bison          | MT    | B. abortus bv. 1 | 14     | 3      | 9      | 2      | 4       | 1       | 5      | 2       | 5       | 8       |
| 563912         | 08-1121     | bison          | MT    | B. abortus bv. 1 | 14     | 3      | 9      | 2      | 4       | 1       | 5      | 2       | 5       | 8       |
| 557001         | 08-0638     | bison          | WY    | B. abortus bv. 1 | 9      | 3      | 9      | 2      | 4       | 1       | 5      | 2       | 5       | 8       |
| 11-045811      | B11-0604    | cattle         | MT    | B. abortus bv. 1 | 6      | 3      | 9      | 2      | 4       | 1       | 5      | 2       | 5       | 5       |
| 372194         | 05-0999     | bison          | WY    | B. abortus bv. 1 | 11     | 3      | 9      | 2      | 4       | 1       | 5      | 2       | 5       | 6       |
| 555145         | 08-041651   | cattle         | MT    | B. abortus bv. 1 | 7      | 3      | 9      | 2      | 4       | 1       | 5      | 2       | 5       | 7       |
| 10-001635      | B10-0529    | elk            | MT    | B. abortus bv. 1 | 7      | 3      | 9      | 2      | 4       | 1       | 6      | 2       | 5       | 7       |
| 557002         | 08-0647     | bison          | WY    | B. abortus bv. 1 | 12     | 3      | 8      | 2      | 4       | 1       | 5      | 2       | 5       | 7       |
| 09-033525      | B10-0273    | elk            | MT    | B. abortus bv. 1 | 9      | 3      | 8      | 2      | 4       | 1       | 5      | 2       | 5       | 7       |
| 560760         | 08-0869     | bison          | WY    | B. abortus bv. 1 | 11     | 3      | 6      | 2      | 4       | 1       | 5      | 2       | 5       | 5       |
| 563917         | 08-1142     | bison          | WY    | B. abortus bv. 1 | 13     | 3      | 6      | 2      | 4       | 1       | 5      | 2       | 5       | 5       |
| 560166         | 08-0829     | bison          | WY    | B. abortus bv. 1 | 8      | 3      | 6      | 2      | 4       | 1       | 5      | 2       | 5       | 12      |
| 561953         | 08-0921     | bison          | WY    | B. abortus bv. 1 | 8      | 3      | 6      | 2      | 4       | 1       | 5      | 2       | 5       | 12      |
| 556686         | 08-0482     | bison          | WY    | B. abortus bv. 1 | 8      | 3      | 6      | 2      | 4       | 1       | 5      | 2       | 5       | 11      |
| 565740         | 08-1167     | bison          | WY    | B. abortus bv. 1 | 8      | 3      | 6      | 2      | 4       | 1       | 5      | 2       | 5       | 11      |
| 553674         | 08-0392     | bison          | MT    | B. abortus bv. 1 | 8      | 3      | 6      | 2      | 4       | 1       | 5      | 2       | 5       | 5       |
| 10-023707      | B10-0973    | bison          | MT    | B. abortus bv. 1 | 7      | 3      | 6      | 2      | 4       | 1       | 5      | 2       | 5       | 4       |

|           |            |        |    |                  |    |   |    |   |   |   |   |   |   |    |
|-----------|------------|--------|----|------------------|----|---|----|---|---|---|---|---|---|----|
| 10-023707 | B10-0975   | bison  | MT | B. abortus bv. 1 | 7  | 3 | 6  | 2 | 4 | 1 | 5 | 2 | 5 | 4  |
| 553656    | 08-0382    | bison  | MT | B. abortus bv. 1 | 5  | 3 | 6  | 2 | 4 | 1 | 5 | 2 | 5 | 9  |
| 563918    | 08-1147    | bison  | WY | B. abortus bv. 1 | 5  | 3 | 6  | 2 | 4 | 1 | 5 | 2 | 5 | 9  |
| 565747    | 08-1188    | bison  | WY | B. abortus bv. 1 | 5  | 3 | 4  | 2 | 4 | 1 | 5 | 2 | 5 | 9  |
| 562882    | 08-0977    | bison  | WY | B. abortus bv. 1 | 13 | 3 | 6  | 2 | 4 | 1 | 5 | 2 | 5 | 9  |
| 563910    | 08-1116    | bison  | WY | B. abortus bv. 1 | 11 | 3 | 6  | 2 | 4 | 1 | 5 | 2 | 5 | 8  |
| 567484    | 08-1212    | bison  | WY | B. abortus bv. 1 | 11 | 3 | 6  | 2 | 4 | 1 | 5 | 2 | 5 | 8  |
| 557002    | 08-0645    | bison  | WY | B. abortus bv. 1 | 5  | 3 | 6  | 2 | 4 | 1 | 5 | 2 | 5 | 8  |
| 563110    | 08-1019    | bison  | MT | B. abortus bv. 1 | 5  | 3 | 6  | 2 | 4 | 1 | 5 | 2 | 5 | 8  |
| 563905    | 08-1101    | bison  | MT | B. abortus bv. 1 | 5  | 3 | 6  | 2 | 4 | 1 | 5 | 2 | 5 | 8  |
| 563912    | 08-1124    | bison  | MT | B. abortus bv. 1 | 5  | 3 | 6  | 2 | 4 | 1 | 5 | 2 | 5 | 8  |
| 563916    | 08-1138    | bison  | WY | B. abortus bv. 1 | 5  | 3 | 6  | 2 | 4 | 1 | 5 | 2 | 5 | 8  |
| 560761    | 08-0876    | bison  | WY | B. abortus bv. 1 | 5  | 3 | 6  | 2 | 4 | 1 | 5 | 2 | 5 | 11 |
| 562877    | 08-0951 S2 | bison  | WY | B. abortus bv. 1 | 12 | 3 | 6  | 2 | 4 | 1 | 5 | 2 | 5 | 11 |
| 562877    | 08-0952 S2 | bison  | WY | B. abortus bv. 1 | 12 | 3 | 6  | 2 | 4 | 1 | 5 | 2 | 5 | 10 |
| 562880    | 08-0966    | bison  | WY | B. abortus bv. 1 | 12 | 3 | 7  | 2 | 4 | 1 | 5 | 2 | 5 | 11 |
| 496198    | 07-0266    | cattle | MT | B. abortus bv. 1 | 5  | 3 | 7  | 2 | 4 | 1 | 5 | 2 | 5 | 5  |
| 11-020659 | B11-0480   | bison  | MT | B. abortus bv. 1 | 8  | 3 | 7  | 2 | 4 | 1 | 5 | 2 | 5 | 5  |
| 560164    | 08-0817    | bison  | WY | B. abortus bv. 1 | 8  | 3 | 7  | 2 | 4 | 1 | 5 | 2 | 5 | 10 |
| 560170    | 08-0848    | bison  | WY | B. abortus bv. 1 | 8  | 3 | 7  | 2 | 4 | 1 | 5 | 2 | 5 | 10 |
| 560172    | 08-0857    | bison  | WY | B. abortus bv. 1 | 8  | 3 | 7  | 2 | 4 | 1 | 5 | 2 | 5 | 10 |
| 560172    | 08-0861    | bison  | WY | B. abortus bv. 1 | 8  | 3 | 7  | 2 | 4 | 1 | 5 | 2 | 5 | 10 |
| 562880    | 08-0966    | bison  | WY | B. abortus bv. 1 | 12 | 3 | 7  | 2 | 4 | 1 | 5 | 2 | 5 | 10 |
| 562877    | 08-0953    | bison  | WY | B. abortus bv. 1 | 11 | 3 | 7  | 2 | 4 | 1 | 5 | 2 | 5 | 9  |
| 567492    | 08-1241    | bison  | WY | B. abortus bv. 1 | 11 | 3 | 7  | 2 | 4 | 1 | 5 | 2 | 5 | 3  |
| 555997    | 08-0447    | bison  | WY | B. abortus bv. 1 | 12 | 3 | 11 | 2 | 4 | 1 | 5 | 2 | 5 | 5  |
| 567490    | 08-1234    | bison  | WY | B. abortus bv. 1 | 4  | 3 | 10 | 2 | 4 | 1 | 5 | 2 | 5 | 5  |
| 565751    | 08-1205    | bison  | WY | B. abortus bv. 1 | 14 | 3 | 10 | 2 | 4 | 1 | 5 | 2 | 5 | 9  |
| 557004    | 08-0656    | bison  | WY | B. abortus bv. 1 | 8  | 3 | 5  | 2 | 4 | 1 | 4 | 2 | 5 | 8  |
| 588409    | 09-0286    | elk    | MT | B. abortus bv. 1 | 8  | 3 | 8  | 2 | 4 | 1 | 4 | 2 | 5 | 5  |
| 561953    | 08-0930    | bison  | MT | B. abortus bv. 1 | 8  | 3 | 6  | 2 | 4 | 1 | 4 | 2 | 5 | 7  |
| 561953    | 08-0930    | bison  | MT | B. abortus bv. 1 | 7  | 3 | 6  | 2 | 4 | 1 | 4 | 2 | 5 | 7  |
| 561953    | 08-0928    | bison  | MT | B. abortus bv. 1 | 12 | 3 | 3  | 2 | 4 | 1 | 4 | 2 | 5 | 9  |
| 553670    | 08-0389    | bison  | MT | B. abortus bv. 1 | 10 | 3 | 7  | 2 | 4 | 1 | 4 | 2 | 5 | 11 |
| 588409    | 09-0286    | elk    | MT | B. abortus bv. 1 | 9  | 3 | 7  | 2 | 4 | 1 | 4 | 2 | 5 | 5  |
| 11-019422 | B11-0469   | bison  | MT | B. abortus bv. 1 | 9  | 3 | 7  | 2 | 4 | 1 | 4 | 2 | 3 | 10 |
| 371106    | 05-0911    | bison  | MT | B. abortus bv. 1 | 8  | 3 | 7  | 2 | 4 | 1 | 4 | 1 | 5 | 7  |
| 372442    | 05-1008    | bison  | WY | B. abortus bv. 1 | 9  | 3 | 7  | 2 | 4 | 1 | 4 | 1 | 5 | 6  |
| 165620    | 02-0137    | bison  | MT | B. abortus bv. 1 | 7  | 3 | 7  | 2 | 4 | 1 | 7 | 2 | 5 | 12 |
| 85-26315  |            | bison  | MT | B. abortus bv. 1 | 13 | 3 | 7  | 2 | 4 | 1 | 7 | 2 | 5 | 10 |
| 588409    | 09-0276    | elk    | MT | B. abortus bv. 1 | 10 | 4 | 7  | 2 | 4 | 1 | 7 | 2 | 5 | 10 |
| 432543    | 06-0402    | bison  | WY | B. abortus bv. 1 | 8  | 3 | 9  | 2 | 4 | 1 | 7 | 2 | 5 | 11 |
| 565744    | 08-1182    | bison  | WY | B. abortus bv. 1 | 8  | 3 | 5  | 2 | 4 | 1 | 7 | 2 | 6 | 11 |
| 368292    | 05-0822    | bison  | WY | B. abortus bv. 1 | 7  | 3 | 8  | 2 | 4 | 2 | 5 | 2 | 5 | 9  |
| 372194    | 05-1001    | bison  | WY | B. abortus bv. 1 | 7  | 4 | 6  | 2 | 4 | 1 | 4 | 2 | 5 | 9  |
| 560170    | 08-0849    | bison  | WY | B. abortus bv. 1 | 10 | 4 | 6  | 2 | 4 | 1 | 7 | 2 | 5 | 9  |
| 567494    | 08-1247    | bison  | WY | B. abortus bv. 1 | 10 | 4 | 6  | 2 | 4 | 1 | 4 | 2 | 5 | 3  |
| 567490    | 08-1232    | bison  | WY | B. abortus bv. 1 | 9  | 4 | 6  | 2 | 4 | 1 | 7 | 2 | 5 | 11 |
| 567490    | 08-1232    | bison  | WY | B. abortus bv. 1 | 9  | 4 | 6  | 2 | 4 | 1 | 6 | 2 | 5 | 11 |
| 553675    | 08-0393    | bison  | MT | B. abortus bv. 1 | 14 | 4 | 6  | 2 | 4 | 1 | 5 | 2 | 5 | 10 |
| 560169    | 08-0843    | bison  | WY | B. abortus bv. 1 | 4  | 4 | 11 | 2 | 4 | 1 | 5 | 2 | 5 | 10 |
| 562881    | 08-0973    | bison  | WY | B. abortus bv. 1 | 9  | 4 | 7  | 2 | 4 | 1 | 5 | 2 | 5 | 10 |
| 565739    | 08-1160    | bison  | WY | B. abortus bv. 1 | 9  | 4 | 7  | 2 | 4 | 1 | 5 | 2 | 5 | 10 |
| 539969    | 08-0151    | elk    | MT | B. abortus bv. 1 | 9  | 4 | 8  | 2 | 4 | 1 | 5 | 2 | 5 | 10 |
| 554884    | 08-0410    | bison  | MT | B. abortus bv. 1 | 9  | 4 | 8  | 2 | 4 | 1 | 6 | 2 | 5 | 10 |
| 391747    | 05-1282    | bison  | MT | B. abortus bv. 1 | 9  | 4 | 5  | 2 | 4 | 1 | 5 | 1 | 5 | 10 |
| 563908    | 08-1113    | bison  | WY | B. abortus bv. 1 | 12 | 4 | 7  | 2 | 4 | 1 | 6 | 2 | 5 | 11 |
| 602350    | 09-0553    | bison  | MT | B. abortus bv. 1 | 12 | 6 | 7  | 2 | 4 | 1 | 6 | 2 | 5 | 4  |
| 560769    | 08-0913    | bison  | WY | B. abortus bv. 1 | 10 | 5 | 7  | 2 | 4 | 1 | 6 | 2 | 5 | 5  |

|           |          |        |    |                  |    |   |    |   |   |   |   |   |   |    |
|-----------|----------|--------|----|------------------|----|---|----|---|---|---|---|---|---|----|
| 562878    | 08-0960  | bison  | WY | B. abortus bv. 1 | 10 | 5 | 7  | 2 | 4 | 1 | 6 | 2 | 5 | 5  |
| 556000    | 08-0459  | bison  | WY | B. abortus bv. 1 | 10 | 5 | 7  | 2 | 4 | 1 | 3 | 2 | 5 | 5  |
| 556001    | 08-0463  | bison  | WY | B. abortus bv. 1 | 10 | 5 | 7  | 2 | 4 | 1 | 2 | 2 | 5 | 5  |
| 560769    | 08-0913  | bison  | WY | B. abortus bv. 1 | 9  | 5 | 7  | 2 | 4 | 1 | 6 | 2 | 5 | 5  |
| 553658    | 08-0383  | bison  | MT | B. abortus bv. 1 | 11 | 5 | 6  | 2 | 4 | 1 | 6 | 2 | 5 | 8  |
| 555997    | 08-0445  | bison  | WY | B. abortus bv. 1 | 7  | 5 | 8  | 2 | 4 | 1 | 7 | 2 | 6 | 4  |
| 243201    |          | bison  | FL | B. abortus bv. 1 | 5  | 5 | 8  | 2 | 4 | 1 | 7 | 2 | 6 | 4  |
| 561953    | 08-0924  | bison  | MT | B. abortus bv. 1 | 12 | 5 | 8  | 2 | 4 | 1 | 6 | 2 | 6 | 4  |
| 567486    | 08-1221  | bison  | WY | B. abortus bv. 1 | 12 | 5 | 8  | 2 | 4 | 1 | 6 | 2 | 6 | 4  |
| 563908    | 08-1111  | bison  | WY | B. abortus bv. 1 | 13 | 5 | 8  | 2 | 4 | 1 | 6 | 2 | 6 | 4  |
| 378788    | 05-1132  | bison  | MT | B. abortus bv. 1 | 6  | 6 | 8  | 2 | 4 | 1 | 8 | 2 | 6 | 4  |
| 539969    | 08-0187  | elk    | MT | B. abortus bv. 1 | 7  | 5 | 8  | 2 | 4 | 1 | 8 | 2 | 7 | 5  |
| 562887    | 08-0996  | bison  | WY | B. abortus bv. 1 | 7  | 3 | 8  | 2 | 4 | 1 | 5 | 2 | 6 | 11 |
| 567488    | 08-1229  | bison  | WY | B. abortus bv. 1 | 4  | 3 | 8  | 2 | 4 | 1 | 5 | 2 | 6 | 11 |
| 561953    | 08-0929  | bison  | MT | B. abortus bv. 1 | 4  | 3 | 8  | 2 | 4 | 1 | 5 | 2 | 6 | 10 |
| 567488    | 08-1229  | bison  | WY | B. abortus bv. 1 | 4  | 3 | 8  | 2 | 4 | 1 | 5 | 2 | 6 | 10 |
| 555415    | 08-0423  | bison  | MT | B. abortus bv. 1 | 5  | 3 | 8  | 2 | 4 | 1 | 5 | 2 | 6 | 10 |
| 553671    | 08-0390  | bison  | MT | B. abortus bv. 1 | 6  | 3 | 8  | 2 | 4 | 1 | 5 | 2 | 6 | 12 |
| 557002    | 08-0644  | bison  | WY | B. abortus bv. 1 | 6  | 4 | 8  | 2 | 4 | 1 | 5 | 2 | 6 | 13 |
| 562885    | 08-0988  | bison  | WY | B. abortus bv. 1 | 10 | 3 | 8  | 2 | 4 | 1 | 7 | 2 | 6 | 8  |
| 553707    | 08-0405  | bison  | MT | B. abortus bv. 1 | 8  | 3 | 8  | 2 | 4 | 1 | 6 | 2 | 6 | 12 |
| 563908    | 08-1112  | bison  | WY | B. abortus bv. 1 | 8  | 3 | 8  | 2 | 4 | 1 | 6 | 2 | 6 | 12 |
| 567648    | 08-1256  | bison  | MT | B. abortus bv. 1 | 8  | 3 | 9  | 2 | 4 | 1 | 6 | 2 | 6 | 12 |
| 565739    | 08-1161  | bison  | WY | B. abortus bv. 1 | 7  | 3 | 9  | 2 | 4 | 1 | 6 | 2 | 6 | 12 |
| 560167    | 08-0832  | bison  | WY | B. abortus bv. 1 | 10 | 3 | 5  | 2 | 4 | 1 | 6 | 2 | 6 | 12 |
| 560166    | 08-0830  | bison  | WY | B. abortus bv. 1 | 8  | 3 | 8  | 2 | 4 | 1 | 8 | 2 | 6 | 14 |
| 560166    | 08-0831  | bison  | WY | B. abortus bv. 1 | 9  | 3 | 4  | 2 | 4 | 1 | 6 | 2 | 4 | 3  |
| 560765    | 08-0893  | bison  | WY | B. abortus bv. 1 | 9  | 3 | 4  | 2 | 4 | 1 | 6 | 2 | 4 | 3  |
| 561953    | 08-0923  | bison  | MT | B. abortus bv. 1 | 9  | 3 | 4  | 2 | 4 | 1 | 6 | 2 | 4 | 3  |
| 563907    | 08-1107  | bison  | WY | B. abortus bv. 1 | 9  | 3 | 4  | 2 | 4 | 1 | 6 | 2 | 4 | 3  |
| 567492    | 08-1240  | bison  | WY | B. abortus bv. 1 | 9  | 3 | 4  | 2 | 4 | 1 | 6 | 2 | 4 | 3  |
| 556000    | 08-0462  | bison  | WY | B. abortus bv. 1 | 10 | 3 | 4  | 2 | 4 | 1 | 6 | 2 | 4 | 3  |
| 560164    | 08-0820  | bison  | WY | B. abortus bv. 1 | 10 | 3 | 4  | 2 | 4 | 1 | 6 | 2 | 4 | 3  |
| 560165    | 08-0822  | bison  | WY | B. abortus bv. 1 | 10 | 3 | 4  | 2 | 4 | 1 | 6 | 2 | 4 | 3  |
| 560165    | 08-0824  | bison  | WY | B. abortus bv. 1 | 10 | 3 | 4  | 2 | 4 | 1 | 6 | 2 | 4 | 3  |
| 560165    | 08-0826  | bison  | WY | B. abortus bv. 1 | 10 | 3 | 4  | 2 | 4 | 1 | 6 | 2 | 4 | 3  |
| 560167    | 08-0834  | bison  | WY | B. abortus bv. 1 | 10 | 3 | 4  | 2 | 4 | 1 | 6 | 2 | 4 | 3  |
| 560167    | 08-0835  | bison  | WY | B. abortus bv. 1 | 10 | 3 | 4  | 2 | 4 | 1 | 6 | 2 | 4 | 3  |
| 560168    | 08-0837  | bison  | WY | B. abortus bv. 1 | 10 | 3 | 4  | 2 | 4 | 1 | 6 | 2 | 4 | 3  |
| 560171    | 08-0853  | bison  | WY | B. abortus bv. 1 | 10 | 3 | 4  | 2 | 4 | 1 | 6 | 2 | 4 | 3  |
| 560173    | 08-0863  | bison  | WY | B. abortus bv. 1 | 10 | 3 | 4  | 2 | 4 | 1 | 6 | 2 | 4 | 3  |
| 560173    | 08-0864  | bison  | WY | B. abortus bv. 1 | 10 | 3 | 4  | 2 | 4 | 1 | 6 | 2 | 4 | 3  |
| 560173    | 08-0865  | bison  | WY | B. abortus bv. 1 | 10 | 3 | 4  | 2 | 4 | 1 | 6 | 2 | 4 | 3  |
| 561953    | 08-0923  | bison  | MT | B. abortus bv. 1 | 10 | 3 | 4  | 2 | 4 | 1 | 6 | 2 | 4 | 3  |
| 563902    | 08-1095  | bison  | WY | B. abortus bv. 1 | 10 | 3 | 4  | 2 | 4 | 1 | 6 | 2 | 4 | 3  |
| 571693    | 08-1354  | bison  | MT | B. abortus bv. 1 | 10 | 3 | 4  | 2 | 4 | 1 | 6 | 2 | 4 | 3  |
| 563912    | 08-1123  | bison  | MT | B. abortus bv. 1 | 9  | 3 | 4  | 2 | 4 | 1 | 5 | 2 | 4 | 3  |
| 11-018123 | B11-0442 | bison  | MT | B. abortus bv. 1 | 7  | 3 | 5  | 2 | 4 | 1 | 6 | 2 | 4 | 3  |
| 11-018123 | B11-0442 | bison  | MT | B. abortus bv. 1 | 7  | 3 | 5  | 2 | 4 | 1 | 6 | 2 | 4 | 3  |
| 10-008689 | B10-0584 | elk    | MT | B. abortus bv. 1 | 10 | 3 | 5  | 2 | 4 | 1 | 5 | 2 | 4 | 7  |
| 563910    | 08-1115  | bison  | WY | B. abortus bv. 1 | 9  | 3 | 12 | 2 | 4 | 1 | 4 | 2 | 4 | 8  |
| 567488    | 08-1228  | bison  | WY | B. abortus bv. 1 | 9  | 3 | 12 | 2 | 4 | 1 | 4 | 2 | 4 | 8  |
| 10-008689 | B10-0584 | elk    | MT | B. abortus bv. 1 | 9  | 3 | 5  | 2 | 4 | 1 | 5 | 2 | 4 | 8  |
| 90-16432  |          | cattle | MS | B. abortus bv. 1 | 3  | 8 | 3  | 2 | 4 | 1 | 4 | 2 | 4 | 4  |
| 90-23369  |          | human  |    | B. abortus bv. 2 | 2  | 8 | 3  | 2 | 4 | 1 | 4 | 2 | 5 | 4  |
| 562879    | 08-0962  | bison  | WY | B. abortus bv. 1 | 7  | 3 | 3  | 2 | 4 | 1 | 6 | 2 | 4 | 4  |
| 562879    | 08-0962  | bison  | WY | B. abortus bv. 1 | 4  | 3 | 3  | 2 | 4 | 1 | 6 | 2 | 4 | 4  |
| 426555    | 06-0281  | bison  | MT | B. abortus bv. 1 | 6  | 3 | 3  | 2 | 4 | 1 | 5 | 2 | 4 | 4  |
| 436720    | 06-0429  | bison  | MT | B. abortus bv. 1 | 6  | 3 | 3  | 2 | 4 | 1 | 5 | 2 | 4 | 4  |

|           |          |        |    |                           |   |   |   |   |   |   |   |   |   |    |
|-----------|----------|--------|----|---------------------------|---|---|---|---|---|---|---|---|---|----|
| 453922    | 06-0887  | bison  | MT | B. abortus bv. 1          | 6 | 3 | 3 | 2 | 4 | 1 | 5 | 2 | 4 | 4  |
| 419836    | 06-0168  | bison  | MT | B. abortus bv. 1          | 7 | 3 | 3 | 2 | 4 | 1 | 5 | 2 | 4 | 4  |
| 426558    | 06-0279  | bison  | MT | B. abortus bv. 1          | 7 | 3 | 3 | 2 | 4 | 1 | 5 | 2 | 4 | 4  |
| 555999    | 08-0456  | bison  | WY | B. abortus bv. 1          | 7 | 3 | 3 | 2 | 4 | 1 | 5 | 2 | 4 | 4  |
| 392810    | 05-1285  | cattle | TX | B. abortus bv. 1          | 4 | 5 | 4 | 2 | 4 | 1 | 7 | 2 | 4 | 5  |
| 392810    | 05-1286  | cattle | TX | B. abortus bv. 1          | 4 | 5 | 4 | 2 | 4 | 1 | 9 | 2 | 4 | 5  |
| 557690    | 08-0665  | cattle | WY | B. abortus bv. 4          | 2 | 7 | 3 | 2 | 4 | 1 | 3 | 2 | 4 | 9  |
| 557690    | 08-0666  | cattle | WY | B. abortus bv. 4          | 2 | 7 | 3 | 2 | 4 | 1 | 3 | 2 | 4 | 9  |
| 575556    | 09-0009  | cattle | WY | B. abortus bv.4           | 2 | 7 | 3 | 2 | 4 | 1 | 3 | 2 | 4 | 9  |
|           | 00-0670  | elk    | ID | B. abortus bv. 1          | 2 | 7 | 3 | 2 | 4 | 1 | 3 | 2 | 4 | 7  |
|           | 00-0671  | elk    | ID | B. abortus bv. 4          | 2 | 7 | 3 | 2 | 4 | 1 | 3 | 2 | 4 | 7  |
|           | 00-0672  | elk    | ID | B. abortus bv. 4          | 2 | 7 | 3 | 2 | 4 | 1 | 3 | 2 | 4 | 7  |
|           | 00-0673  | elk    | ID | B. abortus bv. 4          | 2 | 7 | 3 | 2 | 4 | 1 | 3 | 2 | 4 | 7  |
|           | 00-0674  | elk    | ID | B. abortus bv. 4          | 2 | 7 | 3 | 2 | 4 | 1 | 3 | 2 | 4 | 7  |
|           | 00-0675  | elk    | ID | B. abortus bv. 4          | 2 | 7 | 3 | 2 | 4 | 1 | 3 | 2 | 4 | 7  |
|           | 00-0676  | elk    | ID | B. abortus bv. 4          | 2 | 7 | 3 | 2 | 4 | 1 | 3 | 2 | 4 | 7  |
| 51837     | 00-0677  | elk    | ID | B. abortus bv. 4          | 2 | 7 | 3 | 2 | 4 | 1 | 3 | 2 | 4 | 7  |
|           | 00-0678  | elk    | ID | B. abortus bv. 4          | 2 | 7 | 3 | 2 | 4 | 1 | 3 | 2 | 4 | 7  |
|           | 00-0679  | elk    | ID | B. abortus bv. 4          | 2 | 7 | 3 | 2 | 4 | 1 | 3 | 2 | 4 | 7  |
| 300438    | 04-0196  | elk    | ID | B. abortus bv. 4          | 2 | 7 | 3 | 2 | 4 | 1 | 3 | 2 | 4 | 7  |
|           | 00-0669  | elk    | ID | B. abortus bv. 1          | 2 | 7 | 3 | 2 | 4 | 1 | 3 | 2 | 4 | 8  |
| 575556    | 09-0005  | elk    | WY | B. abortus bv. 4          | 2 | 7 | 3 | 2 | 4 | 1 | 3 | 2 | 4 | 8  |
| 10-061994 | B11-0144 | elk    | WY | B. abortus bv. 1          | 2 | 7 | 3 | 2 | 4 | 1 | 3 | 2 | 4 | 8  |
| 10-061994 | B11-0146 | elk    | WY | B. abortus bv. 4          | 2 | 7 | 3 | 2 | 4 | 1 | 3 | 2 | 4 | 8  |
| 10-061994 | B11-0159 | elk    | WY | B. abortus bv. 1          | 2 | 7 | 3 | 2 | 4 | 1 | 3 | 2 | 4 | 4  |
| 51837     | 00-0668  | elk    | ID | B. abortus bv. 1          | 2 | 8 | 3 | 2 | 4 | 1 | 3 | 2 | 4 | 7  |
| 180373    | 02-0246  | elk    | ID | B. abortus bv. 4          | 2 | 7 | 3 | 2 | 4 | 1 | 3 | 2 | 3 | 7  |
| 10-061994 | B11-0150 | elk    | WY | B. abortus bv. 1          | 2 | 6 | 3 | 2 | 4 | 1 | 3 | 2 | 4 | 7  |
| 10-061994 | B11-0161 | elk    | WY | B. abortus bv. 4          | 2 | 6 | 3 | 2 | 4 | 1 | 3 | 2 | 4 | 7  |
| 342040    | 05-0022  | cattle | WY | B. abortus bv. 4          | 2 | 6 | 3 | 2 | 4 | 1 | 3 | 2 | 4 | 6  |
| 365387    | 05-0756  | elk    | ID | B. abortus bv. 4          | 2 | 6 | 3 | 2 | 4 | 1 | 3 | 2 | 4 | 6  |
| 365387    | 05-0757  | elk    | ID | B. abortus bv. 4          | 2 | 6 | 3 | 2 | 4 | 1 | 3 | 2 | 4 | 6  |
| 575555    | 09-0004  | elk    | WY | B. abortus bv. 4          | 2 | 6 | 3 | 2 | 4 | 1 | 3 | 2 | 4 | 6  |
| 575556    | 09-0006  | elk    | WY | B. abortus bv. 1          | 2 | 6 | 3 | 2 | 4 | 1 | 3 | 2 | 4 | 6  |
| 348993    | 05-0338  | cattle | WY | B. abortus bv. 4          | 2 | 7 | 3 | 2 | 4 | 1 | 3 | 0 | 4 | 6  |
| 10-061994 | B11-0153 | elk    | WY | B. abortus bv. 1 / bv 4 ? | 2 | 7 | 3 | 2 | 4 | 1 | 4 | 2 | 4 | 3  |
| 10-061994 | B11-0154 | elk    | WY | B. abortus bv. 1          | 2 | 7 | 3 | 2 | 4 | 1 | 4 | 2 | 4 | 5  |
| 10-061994 | B11-0148 | elk    | WY | B. abortus bv. 1, bv 4 ?  | 2 | 7 | 3 | 2 | 4 | 1 | 4 | 2 | 5 | 6  |
| 562885    | 08-0986  | bison  | WY | B. abortus bv. 1          | 2 | 7 | 5 | 2 | 4 | 1 | 3 | 2 | 4 | 3  |
| 22062     | 98-0616  | cattle | TX | B. abortus bv. 1          | 2 | 4 | 5 | 2 | 4 | 1 | 3 | 2 | 4 | 3  |
| 563910    | 08-1118  | bison  | WY | B. abortus bv. 1          | 2 | 8 | 5 | 2 | 4 | 1 | 3 | 2 | 4 | 3  |
| 562877    | 08-0955  | bison  | WY | B. abortus bv. 1          | 2 | 8 | 4 | 2 | 4 | 1 | 3 | 2 | 4 | 3  |
| 563905    | 08-1103  | bison  | MT | B. abortus bv. 1          | 2 | 8 | 4 | 2 | 4 | 1 | 3 | 2 | 4 | 3  |
| 565740    | 08-1165  | bison  | WY | B. abortus bv. 1          | 2 | 8 | 4 | 2 | 4 | 1 | 3 | 2 | 4 | 3  |
| 565744    | 08-1180  | bison  | WY | B. abortus bv. 1          | 2 | 8 | 4 | 2 | 4 | 1 | 3 | 2 | 4 | 3  |
| 555996    | 08-0440  | bison  | WY | B. abortus bv. 1          | 2 | 7 | 4 | 2 | 4 | 1 | 3 | 2 | 4 | 3  |
| 560172    | 08-0859  | bison  | WY | B. abortus bv. 1          | 2 | 7 | 4 | 2 | 4 | 1 | 3 | 2 | 4 | 3  |
| 561953    | 08-0927  | bison  | MT | B. abortus bv. 1          | 2 | 7 | 4 | 2 | 4 | 1 | 3 | 2 | 4 | 3  |
| 563907    | 08-1106  | bison  | WY | B. abortus bv. 1          | 2 | 7 | 4 | 2 | 4 | 1 | 3 | 2 | 4 | 3  |
| 563907    | 08-1106  | bison  | WY | B. abortus bv. 1          | 2 | 6 | 4 | 2 | 4 | 1 | 3 | 2 | 4 | 3  |
| 22062     | 98-0613  | cattle | TX | B. abortus bv. 1          | 2 | 5 | 6 | 2 | 4 | 1 | 3 | 2 | 4 | 3  |
| 22062     | 98-0618  | cattle | TX | B. abortus bv. 1          | 2 | 5 | 6 | 2 | 4 | 1 | 3 | 2 | 4 | 3  |
| 22062     | 98-0612  | cattle | TX | B. abortus bv. 1          | 2 | 3 | 6 | 2 | 4 | 1 | 3 | 2 | 4 | 3  |
| 22062     | 98-0614  | cattle | TX | B. abortus bv. 1          | 2 | 6 | 6 | 2 | 4 | 1 | 3 | 2 | 4 | 3  |
| 22062     | 98-0615  | cattle | TX | B. abortus bv. 1          | 2 | 8 | 6 | 2 | 4 | 1 | 3 | 2 | 4 | 3  |
| 22062     | 98-0617  | cattle | TX | B. abortus bv. 1          | 2 | 3 | 7 | 2 | 4 | 1 | 3 | 2 | 4 | 2  |
| 354997    | 05-0444  | cattle | TX | B. abortus bv. 1          | 2 | 6 | 4 | 2 | 4 | 1 | 5 | 2 | 4 | 11 |
| 355805    | 05-0447  | cattle | TX | B. abortus bv. 1          | 2 | 6 | 4 | 2 | 4 | 1 | 5 | 2 | 4 | 5  |
| 557004    | 08-0657  | bison  | WY | B. abortus bv. 1          | 2 | 6 | 4 | 2 | 4 | 1 | 3 | 2 | 4 | 4  |

|           |           |          |    |                               |    |   |    |   |   |   |   |   |   |    |
|-----------|-----------|----------|----|-------------------------------|----|---|----|---|---|---|---|---|---|----|
| 20370     | 98-0559   | cattle   | TX | B. abortus bv. 1              | 10 | 3 | 5  | 2 | 3 | 1 | 3 | 2 | 4 | 8  |
| 20370     | 98-0562   | cattle   | TX | B. abortus bv. 1              | 12 | 3 | 5  | 2 | 3 | 1 | 3 | 2 | 4 | 8  |
| 20370     | 98-0560   | cattle   | TX | B. abortus bv. 1              | 12 | 3 | 5  | 2 | 3 | 1 | 3 | 2 | 4 | 6  |
| 20370     | 98-0564   | cattle   | TX | B. abortus bv. 1              | 12 | 3 | 5  | 2 | 3 | 1 | 3 | 2 | 4 | 6  |
| 20370     | 98-0561   | cattle   | TX | B. abortus bv. 1              | 13 | 3 | 5  | 2 | 3 | 1 | 3 | 2 | 4 | 6  |
| 20370     | 98-0563   | cattle   | TX | B. abortus bv. 1              | 11 | 3 | 6  | 2 | 3 | 1 | 3 | 2 | 4 | 6  |
| 561953    | 08-0924   | bison    | MT | B. abortus bv. 1              | 12 | 5 | 8  | 2 | 3 | 1 | 3 | 2 | 4 | 3  |
| 30291     | 99-0984   | cattle   | TX | B. abortus bv. 1              | 8  | 5 | 5  | 2 | 3 | 1 | 3 | 2 | 5 | 7  |
| 80-10090  |           | bison    | WI | B. abortus bv. 1 atypical     | 6  | 5 | 2  | 2 | 4 | 1 | 2 | 2 | 6 | 3  |
| 90-14734  |           | cattle   | NE | B. abortus bv. 1 atypical     | 5  | 5 | 2  | 2 | 4 | 1 | 2 | 2 | 6 | 3  |
| 89-12292  |           | cattle   | TX | B. abortus bv. 1              | 4  | 5 | 2  | 2 | 4 | 1 | 2 | 2 | 6 | 3  |
| 11-012117 | B11-0280  | bison    | MT | B. abortus RB51               | 5  | 4 | 2  | 2 | 4 | 1 | 2 | 2 | 6 | 3  |
|           | RB51      |          |    | B. abortus RB51               | 5  | 4 | 2  | 2 | 4 | 1 | 2 | 2 | 6 | 3  |
| 243781    | 03-0072   | elk      | ID | B. abortus bv. 1, strain 2308 | 6  | 4 | 2  | 2 | 4 | 1 | 2 | 2 | 6 | 3  |
| 586532    | 09-0269   | cattle   | TX | B. abortus RB51               | 7  | 4 | 4  | 2 | 4 | 1 | 2 | 2 | 6 | 3  |
| 471330    | 07-0062   | cattle   | TX | B. abortus Strain 19          | 6  | 4 | 2  | 2 | 4 | 1 | 2 | 2 | 5 | 7  |
| 82-15556  |           | reindeer | AK | B. abortus bv. 1              | 6  | 7 | 2  | 2 | 4 | 1 | 2 | 2 | 5 | 3  |
| 436983    | 06-0513   | cattle   | TX | B. abortus Strain 19          | 5  | 4 | 2  | 2 | 4 | 1 | 2 | 2 | 4 | 6  |
| 10-029872 | B10-1032  | cattle   | TX | B. abortus Strain 19          | 5  | 4 | 2  | 2 | 4 | 1 | 2 | 2 | 4 | 6  |
| 11-000244 | B11-0194  | cattle   | TX | B. abortus Strain 19          | 5  | 4 | 2  | 2 | 4 | 1 | 2 | 2 | 4 | 6  |
| 451292    | 06-0861 A | cattle   | TX | B. abortus strain 19          | 7  | 4 | 2  | 2 | 4 | 1 | 2 | 2 | 4 | 9  |
| 512872    | 07-0503   | cattle   | TX | B. abortus Strain 19          | 7  | 4 | 2  | 2 | 4 | 1 | 2 | 2 | 4 | 9  |
| 441658    | 06-0537   | cattle   | TX | B. abortus Strain 19          | 8  | 4 | 2  | 2 | 4 | 1 | 2 | 2 | 4 | 9  |
| 451292    | 06-0861 B | cattle   | TX | B. abortus strain 19          | 8  | 4 | 2  | 2 | 4 | 1 | 2 | 2 | 4 | 9  |
| 338938    | 05-0012   | cattle   | TX | B. abortus Strain 19          | 6  | 4 | 2  | 2 | 4 | 1 | 2 | 2 | 4 | 5  |
| 396213    | 05-1317   | cattle   | TX | B. abortus Strain 19          | 6  | 4 | 2  | 2 | 4 | 1 | 2 | 2 | 4 | 5  |
| 405615    | 06-0025   | cattle   | TX | B. abortus Strain 19          | 6  | 7 | 2  | 2 | 4 | 1 | 2 | 2 | 4 | 5  |
| 449219    | 06-0763   | cattle   | TX | B. abortus Strain 19          | 9  | 4 | 2  | 2 | 4 | 1 | 2 | 2 | 4 | 5  |
| 428657    | 06-0287   | cattle   | TX | B. abortus Strain 19          | 4  | 4 | 2  | 2 | 4 | 1 | 2 | 2 | 4 | 5  |
| 87-47722  |           | cattle   | SD | B. abortus bv. 1              | 4  | 8 | 2  | 2 | 4 | 1 | 2 | 2 | 4 | 5  |
| 11-004685 | B11-0204  | cattle   | TX | B. abortus bv. 1              | 8  | 5 | 2  | 2 | 5 | 1 | 2 | 2 | 4 | 6  |
| 11-008856 | B11-0239  | cattle   | TX | B. abortus bv. 1              | 8  | 5 | 2  | 2 | 5 | 1 | 2 | 2 | 4 | 6  |
| 11-008856 | B11-0240  | cattle   | TX | B. abortus bv. 1              | 8  | 5 | 2  | 2 | 5 | 1 | 2 | 2 | 4 | 6  |
| 11-003420 | B11-0202  | cattle   | TX | B. abortus bv. 1              | 8  | 5 | 2  | 2 | 5 | 1 | 2 | 2 | 4 | 7  |
| 11-006383 | B11-0206  | cattle   | TX | B. abortus bv. 1              | 8  | 5 | 2  | 2 | 5 | 1 | 2 | 2 | 4 | 4  |
| 11-023571 | B11-0492  | pig      | TX | B. abortus bv. 1              | 10 | 5 | 2  | 2 | 5 | 1 | 2 | 2 | 4 | 4  |
| 589401    | 09-0328   | elk      | MT | B. abortus bv. 1              | 2  | 4 | 5  | 2 | 3 | 1 | 5 | 2 | 3 | 10 |
| 11-020278 | B11-0473  | bison    | MT | B. abortus bv. 1              | 2  | 4 | 5  | 2 | 3 | 1 | 4 | 2 | 3 | 10 |
| 10-061623 | B11-0140  | elk      | WY | B. abortus bv. 1              | 2  | 4 | 5  | 2 | 3 | 1 | 4 | 2 | 3 | 9  |
| 11-011567 | B11-0264  | elk      | WY | B. abortus bv. 1              | 2  | 4 | 6  | 2 | 3 | 1 | 4 | 2 | 3 | 5  |
| 09-032078 | B10-0091  | elk      | MT | B. abortus bv. 1              | 2  | 4 | 4  | 2 | 3 | 1 | 4 | 2 | 3 | 11 |
| 10-053081 | B11-0011  | bison    | MT | B. abortus bv. 1              | 2  | 4 | 4  | 2 | 3 | 1 | 4 | 2 | 3 | 11 |
| 596921    | 09-0443   | elk      | MT | B. abortus bv. 1              | 2  | 4 | 4  | 2 | 3 | 1 | 4 | 2 | 3 | 4  |
| 10-001635 | B10-0514  | elk      | MT | B. abortus bv. 1              | 2  | 4 | 4  | 2 | 3 | 1 | 4 | 2 | 3 | 9  |
| 10-061994 | B11-0143  | elk      | WY | B. abortus bv. 1, bv 4 ?      | 2  | 4 | 4  | 2 | 3 | 1 | 4 | 2 | 4 | 4  |
| 370796    | 05-0908   | elk      | MT | B. abortus bv. 1              | 2  | 4 | 4  | 2 | 3 | 1 | 5 | 2 | 3 | 8  |
| 09-033523 | B10-0252  | elk      | MT | B. abortus bv. 1              | 2  | 4 | 4  | 2 | 3 | 1 | 7 | 2 | 3 | 8  |
| 10-008688 | B10-0566  | elk      | MT | B. abortus bv. 1              | 2  | 4 | 4  | 2 | 3 | 1 | 7 | 2 | 3 | 13 |
| 90-14725  |           | cattle   | OK | B. abortus bv. 2              | 2  | 4 | 4  | 2 | 3 | 2 | 5 | 2 | 3 | 4  |
| 11-011567 | B11-0275  | elk      | WY | B. abortus bv. 1              | 2  | 4 | 4  | 2 | 3 | 1 | 3 | 2 | 4 | 6  |
| 11-011567 | B11-0276  | elk      | WY | B. abortus bv. 1              | 2  | 4 | 4  | 2 | 3 | 1 | 3 | 2 | 4 | 6  |
| 324739    | 04-0418   | cattle   | SD | B. abortus bv. 1              | 2  | 4 | 6  | 2 | 3 | 1 | 5 | 2 | 4 | 4  |
| 163343    | 02-0123   | elk      | ID | B. abortus bv. 1              | 2  | 3 | 13 | 2 | 3 | 1 | 5 | 2 | 3 | 8  |
| 163343    | 02-0124   | elk      | ID | B. abortus bv. 1              | 2  | 3 | 13 | 2 | 3 | 1 | 5 | 2 | 3 | 8  |
| 179599    | 02-0237   | cattle   | ID | B. abortus bv. 1              | 2  | 3 | 10 | 2 | 3 | 1 | 5 | 2 | 3 | 8  |
| 179599    | 02-0239   | cattle   | ID | B. abortus bv. 1              | 2  | 3 | 9  | 2 | 3 | 1 | 5 | 2 | 3 | 8  |
| 179599    | 02-0236   | cattle   | ID | B. abortus bv. 1              | 2  | 3 | 10 | 2 | 3 | 1 | 5 | 2 | 3 | 9  |
| 179599    | 02-0242   | cattle   | ID | B. abortus bv. 1              | 2  | 3 | 10 | 2 | 3 | 1 | 5 | 2 | 3 | 9  |
| 179599    | 02-0235   | cattle   | ID | B. abortus bv. 1              | 2  | 3 | 4  | 2 | 3 | 1 | 5 | 2 | 3 | 9  |

|               |          |        |    |                           |   |    |   |   |   |   |   |   |   |   |
|---------------|----------|--------|----|---------------------------|---|----|---|---|---|---|---|---|---|---|
| 179599        | 02-0241  | cattle | ID | B. abortus bv. 1          | 2 | 3  | 6 | 2 | 3 | 1 | 5 | 2 | 3 | 9 |
| 84-24646      | 84-24646 | bison  | SD | B. abortus bv. 1          | 2 | 8  | 2 | 2 | 3 | 1 | 5 | 2 | 3 | 3 |
| 94-33777      | 94-1313  | llama  |    | B. abortus bv. 1          | 2 | 8  | 2 | 2 | 3 | 1 | 5 | 2 | 3 | 3 |
| 09-033518     | B10-0203 | elk    | MT | B. abortus bv. 1          | 2 | 4  | 3 | 2 | 3 | 1 | 3 | 2 | 4 | 3 |
| 09-033531     | B10-0325 | elk    | MT | B. abortus bv. 1          | 2 | 4  | 3 | 2 | 3 | 1 | 3 | 2 | 4 | 3 |
| 588409        | 09-0298  | elk    | MT | B. abortus bv. 1          | 2 | 9  | 3 | 2 | 3 | 1 | 3 | 2 | 4 | 3 |
| 10-061994     | B11-0142 | elk    | WY | B. abortus bv. 1, bv 4 ?  | 2 | 9  | 3 | 2 | 3 | 1 | 3 | 2 | 4 | 3 |
| 339944        | 05-0014  | elk    | WY | B. abortus bv. 4          | 2 | 8  | 3 | 2 | 3 | 1 | 3 | 2 | 4 | 3 |
| 11-011567     | B11-0261 | bison  | WY | B. abortus bv. 1          | 2 | 3  | 3 | 2 | 3 | 1 | 3 | 2 | 4 | 3 |
| 11-011567     | B11-0252 | bison  | WY | B. abortus bv. 1          | 2 | 3  | 3 | 2 | 3 | 1 | 4 | 2 | 4 | 3 |
| 11-011567     | B11-0258 | bison  | WY | B. abortus bv. 1          | 2 | 3  | 3 | 2 | 3 | 1 | 4 | 2 | 4 | 3 |
| 11-011567     | B11-0262 | bison  | WY | B. abortus bv. 1          | 2 | 3  | 3 | 2 | 3 | 1 | 4 | 2 | 4 | 3 |
| 10-061994     | B11-0145 | elk    | WY | B. abortus bv. 1, bv 4 ?  | 2 | 4  | 3 | 2 | 3 | 1 | 4 | 2 | 4 | 3 |
| 11-011567     | B11-0250 | bison  | WY | B. abortus bv. 1          | 2 | 4  | 3 | 2 | 3 | 1 | 4 | 2 | 4 | 3 |
| 11-011567     | B11-0251 | bison  | WY | B. abortus bv. 1          | 2 | 4  | 3 | 2 | 3 | 1 | 4 | 2 | 4 | 3 |
| 11-011567     | B11-0253 | bison  | WY | B. abortus bv. 1          | 2 | 4  | 3 | 2 | 3 | 1 | 4 | 2 | 4 | 3 |
| 11-011567     | B11-0254 | bison  | WY | B. abortus bv. 1          | 2 | 4  | 3 | 2 | 3 | 1 | 4 | 2 | 4 | 3 |
| 11-011567     | B11-0255 | bison  | WY | B. abortus bv. 1          | 2 | 4  | 3 | 2 | 3 | 1 | 4 | 2 | 4 | 3 |
| 11-011567     | B11-0259 | bison  | WY | B. abortus bv. 1          | 2 | 4  | 3 | 2 | 3 | 1 | 4 | 2 | 4 | 3 |
| 11-011567     | B11-0260 | bison  | WY | B. abortus bv. 1          | 2 | 4  | 3 | 2 | 3 | 1 | 4 | 2 | 4 | 3 |
| 575556        | 09-0008  | elk    | WY | B. abortus bv. 1          | 2 | 4  | 3 | 2 | 5 | 1 | 5 | 2 | 4 | 3 |
| 575556        | 09-0007  | elk    | WY | B. abortus bv. 1          | 2 | 5  | 3 | 2 | 5 | 1 | 4 | 2 | 5 | 3 |
| 10-061994     | B11-0160 | elk    | WY | B. abortus bv. 1          | 2 | 4  | 3 | 2 | 4 | 1 | 4 | 2 | 5 | 3 |
| 09-033482     | B10-0173 | cattle | ID | B. abortus bv. 1          | 2 | 3  | 3 | 2 | 3 | 1 | 3 | 2 | 3 | 5 |
| 09-034681     | B10-0474 | cattle | ID | B. abortus bv. 1          | 2 | 3  | 3 | 2 | 3 | 1 | 3 | 2 | 3 | 5 |
| 09-029070     | B10-0018 | cattle | ID | B. abortus bv. 1          | 2 | 4  | 3 | 2 | 3 | 1 | 3 | 2 | 3 | 4 |
| 09-030933     | B10-0035 | cattle | ID | B. abortus bv. 1          | 2 | 4  | 3 | 2 | 3 | 1 | 3 | 2 | 3 | 4 |
| 09-032249     | B10-0141 | cattle | ID | B. abortus bv. 1          | 2 | 4  | 3 | 2 | 3 | 1 | 3 | 2 | 3 | 4 |
| 09-032249     | B10-0141 | cattle | ID | B. abortus bv. 1          | 2 | 4  | 3 | 2 | 3 | 1 | 3 | 2 | 3 | 4 |
| 09-034536     | B10-0407 | cattle | ID | B. abortus bv. 1          | 2 | 4  | 3 | 2 | 3 | 1 | 3 | 2 | 3 | 4 |
| 10-011124     | B10-0654 | cattle | ID | B. abortus bv. 1          | 2 | 4  | 3 | 2 | 3 | 1 | 3 | 2 | 3 | 4 |
| 10-011124     | B10-0655 | cattle | ID | B. abortus bv. 1          | 2 | 4  | 3 | 2 | 3 | 1 | 3 | 2 | 3 | 4 |
| 10-020661     | B10-0948 | cattle | ID | B. abortus bv. 1          | 2 | 4  | 3 | 2 | 3 | 1 | 3 | 2 | 3 | 4 |
| 406666        | 06-0031  | cattle | ID | B. abortus bv. 1          | 3 | 6  | 3 | 2 | 3 | 1 | 3 | 2 | 3 | 3 |
| 523179        | 08-0056  | cattle | ID | B. abortus bv. 1          | 1 | 6  | 3 | 2 | 3 | 1 | 3 | 2 | 3 | 3 |
| 11-011567     | B11-0268 | elk    | WY | B. abortus bv. 1          | 2 | 6  | 4 | 2 | 3 | 1 | 3 | 2 | 3 | 3 |
| 11-011567     | B11-0269 | elk    | WY | B. abortus bv. 1          | 2 | 6  | 4 | 2 | 3 | 1 | 3 | 2 | 3 | 3 |
| 406666        | 06-0027  | cattle | ID | B. abortus bv. 1          | 2 | 6  | 3 | 2 | 3 | 1 | 3 | 2 | 3 | 3 |
| 406666        | 06-0032  | cattle | ID | B. abortus bv. 1          | 2 | 6  | 3 | 2 | 3 | 1 | 3 | 2 | 3 | 3 |
| 408269        | 06-0037  | cattle | ID | B. abortus bv. 1          | 2 | 6  | 3 | 2 | 3 | 1 | 3 | 2 | 3 | 3 |
| 433600        | 06-0407  | cattle | ID | B. abortus bv. 1          | 2 | 6  | 3 | 2 | 3 | 1 | 3 | 2 | 3 | 3 |
| 433600        | 06-0410  | cattle | ID | B. abortus bv. 1          | 2 | 6  | 3 | 2 | 3 | 1 | 3 | 2 | 3 | 3 |
| 433600        | 06-0412  | cattle | ID | B. abortus bv. 1          | 2 | 6  | 3 | 2 | 3 | 1 | 3 | 2 | 3 | 3 |
| 434125        | 06-0423  | cattle | ID | B. abortus bv. 1          | 2 | 6  | 3 | 2 | 3 | 1 | 3 | 2 | 3 | 3 |
| 449688        | 06-0793  | cattle | ID | B. abortus bv. 1          | 2 | 6  | 3 | 2 | 3 | 1 | 3 | 2 | 3 | 3 |
| 449688        | 06-0796  | cattle | ID | B. abortus bv. 1          | 2 | 6  | 3 | 2 | 3 | 1 | 3 | 2 | 3 | 3 |
| 449688        | 06-0798  | cattle | ID | B. abortus bv. 1          | 2 | 6  | 3 | 2 | 3 | 1 | 3 | 2 | 3 | 3 |
| 68-3396P      |          |        |    | B. abortus bv. 4          | 6 | 3  | 5 | 2 | 3 | 1 | 3 | 2 | 3 | 2 |
| 10-061994     | B11-0147 | elk    | WY | B. abortus bv. 1, bv 4 ?  | 0 | 3  | 5 | 2 | 3 | 1 | 4 | 2 | 3 | 4 |
| 11-011567     | B11-0263 | elk    | WY | B. abortus bv. 1          | 2 | 3  | 6 | 2 | 3 | 1 | 4 | 2 | 3 | 4 |
| 82-029256     |          | cattle | TN | B. abortus bv. 2 atypical | 7 | 3  | 3 | 2 | 3 | 1 | 4 | 2 | 3 | 2 |
| 560760        | 08-0870  | bison  | WY | B. abortus bv. 1          | 2 | 5  | 5 | 2 | 3 | 1 | 9 | 2 | 3 | 4 |
| 10-054053     | B11-0015 | cattle | WY | B. abortus bv. 1          | 5 | 9  | 4 | 2 | 3 | 1 | 5 | 2 | 3 | 5 |
| field isolate | B11-0038 | cattle | WY | B. abortus bv. 1          | 5 | 9  | 4 | 2 | 3 | 1 | 5 | 2 | 3 | 5 |
| 11-049870     | B12-0002 | cattle | WY | B. abortus bv. 1          | 5 | 15 | 4 | 2 | 3 | 1 | 5 | 2 | 3 | 5 |
| 11-007611     | B11-0208 | cattle | WY | B. abortus bv. 1          | 3 | 7  | 4 | 2 | 3 | 1 | 5 | 2 | 3 | 5 |
| 11-008075     | B11-0210 | cattle | WY | B. abortus bv. 1          | 3 | 7  | 4 | 2 | 3 | 1 | 5 | 2 | 3 | 5 |
| 11-011567     | B11-0273 | elk    | WY | B. abortus bv. 1          | 4 | 10 | 4 | 2 | 3 | 1 | 5 | 2 | 3 | 4 |
| 11-011567     | B11-0274 | elk    | WY | B. abortus bv. 1          | 4 | 10 | 4 | 2 | 3 | 1 | 5 | 2 | 3 | 4 |

|           |          |        |    |                  |   |    |   |   |   |   |   |   |   |    |
|-----------|----------|--------|----|------------------|---|----|---|---|---|---|---|---|---|----|
| 11-011567 | B11-0265 | elk    | WY | B. abortus bv. 1 | 4 | 10 | 4 | 2 | 3 | 1 | 5 | 2 | 3 | 5  |
| 11-011567 | B11-0266 | elk    | WY | B. abortus bv. 1 | 4 | 10 | 4 | 2 | 3 | 1 | 5 | 2 | 3 | 5  |
| 11-011567 | B11-0267 | elk    | WY | B. abortus bv. 1 | 4 | 10 | 4 | 2 | 3 | 1 | 5 | 2 | 3 | 5  |
| 11-053717 | B12-0025 | cattle | WY | B. abortus bv. 1 | 4 | 16 | 4 | 2 | 3 | 1 | 5 | 2 | 3 | 5  |
| 10-054515 | B11-0037 | cattle | WY | B. abortus bv. 1 | 5 | 12 | 4 | 2 | 3 | 1 | 5 | 2 | 4 | 5  |
| 10-001635 | B10-0517 | elk    | MT | B. abortus bv. 1 | 2 | 5  | 4 | 2 | 3 | 1 | 5 | 2 | 3 | 12 |
| 11-011567 | B11-0249 | bison  | WY | B. abortus bv. 1 | 0 | 5  | 4 | 2 | 3 | 1 | 5 | 2 | 3 | 7  |
| 11-011567 | B11-0256 | bison  | WY | B. abortus bv. 1 | 0 | 5  | 4 | 2 | 3 | 1 | 3 | 2 | 3 | 5  |
| 11-011567 | B11-0270 | elk    | WY | B. abortus bv. 1 | 6 | 7  | 4 | 2 | 3 | 1 | 3 | 2 | 3 | 5  |
| 11-011567 | B11-0277 | elk    | WY | B. abortus bv. 1 | 5 | 7  | 4 | 2 | 3 | 1 | 3 | 2 | 3 | 5  |
| 11-011567 | B11-0271 | elk    | WY | B. abortus bv. 1 | 4 | 7  | 5 | 2 | 3 | 1 | 3 | 2 | 3 | 5  |
| 11-011567 | B11-0272 | elk    | WY | B. abortus bv. 1 | 4 | 7  | 5 | 2 | 3 | 1 | 3 | 2 | 3 | 5  |
| 10-057783 | B11-0053 | bison  | WY | B. abortus bv. 1 | 4 | 8  | 4 | 2 | 3 | 1 | 3 | 2 | 3 | 7  |
| 588409    | 09-0295  | elk    | MT | B. abortus bv. 1 | 3 | 5  | 4 | 2 | 3 | 1 | 4 | 2 | 3 | 6  |
| 590672    | 09-0354  | elk    | MT | B. abortus bv. 1 | 3 | 5  | 4 | 2 | 3 | 1 | 5 | 2 | 4 | 6  |
| 339944    | 05-0018  | bison  | WY | B. abortus bv. 1 | 1 | 2  | 4 | 2 | 3 | 1 | 6 | 2 | 3 | 8  |
| 339944    | 05-0019  | bison  | WY | B. abortus bv. 1 | 1 | 2  | 4 | 2 | 3 | 1 | 7 | 2 | 3 | 8  |
| 90-15217  |          | cattle | FL | B. abortus bv. 4 | 5 | 2  | 4 | 2 | 3 | 1 | 6 | 2 | 3 | 2  |
| 10-061623 | B11-0141 | bison  | WY | B. abortus bv. 1 | 0 | 2  | 4 | 2 | 3 | 1 | 8 | 2 | 3 | 6  |
| 11-011567 | B11-0248 | bison  | WY | B. abortus bv. 1 | 0 | 2  | 4 | 2 | 3 | 1 | 8 | 2 | 3 | 6  |
| 11-011567 | B11-0257 | bison  | WY | B. abortus bv. 1 | 0 | 2  | 4 | 2 | 3 | 1 | 9 | 2 | 3 | 6  |
| 372442    | 05-1002  | bison  | WY | B. abortus bv. 1 | 8 | 2  | 3 | 2 | 4 | 1 | 4 | 2 | 3 | 5  |
| 372442    | 05-1003  | bison  | WY | B. abortus bv. 1 | 8 | 2  | 3 | 2 | 4 | 1 | 4 | 2 | 3 | 5  |
| 372442    | 05-1005  | bison  | WY | B. abortus bv. 1 | 8 | 2  | 3 | 2 | 4 | 1 | 4 | 2 | 3 | 5  |
| 372442    | 05-1007  | bison  | WY | B. abortus bv. 1 | 6 | 2  | 3 | 2 | 4 | 1 | 4 | 2 | 3 | 5  |
